# Supplementary material for: Proteasomal-dependent CHK1 degradation leads to DNA damage accumulation in ALS cellular model systems
Source: Research Square preprint supplement (doi:10.21203/rs.3.rs-7310250/v1), 2025-09-02

**Dashed lines indicate where membranes were cropped**

Relative to Fig. S1A

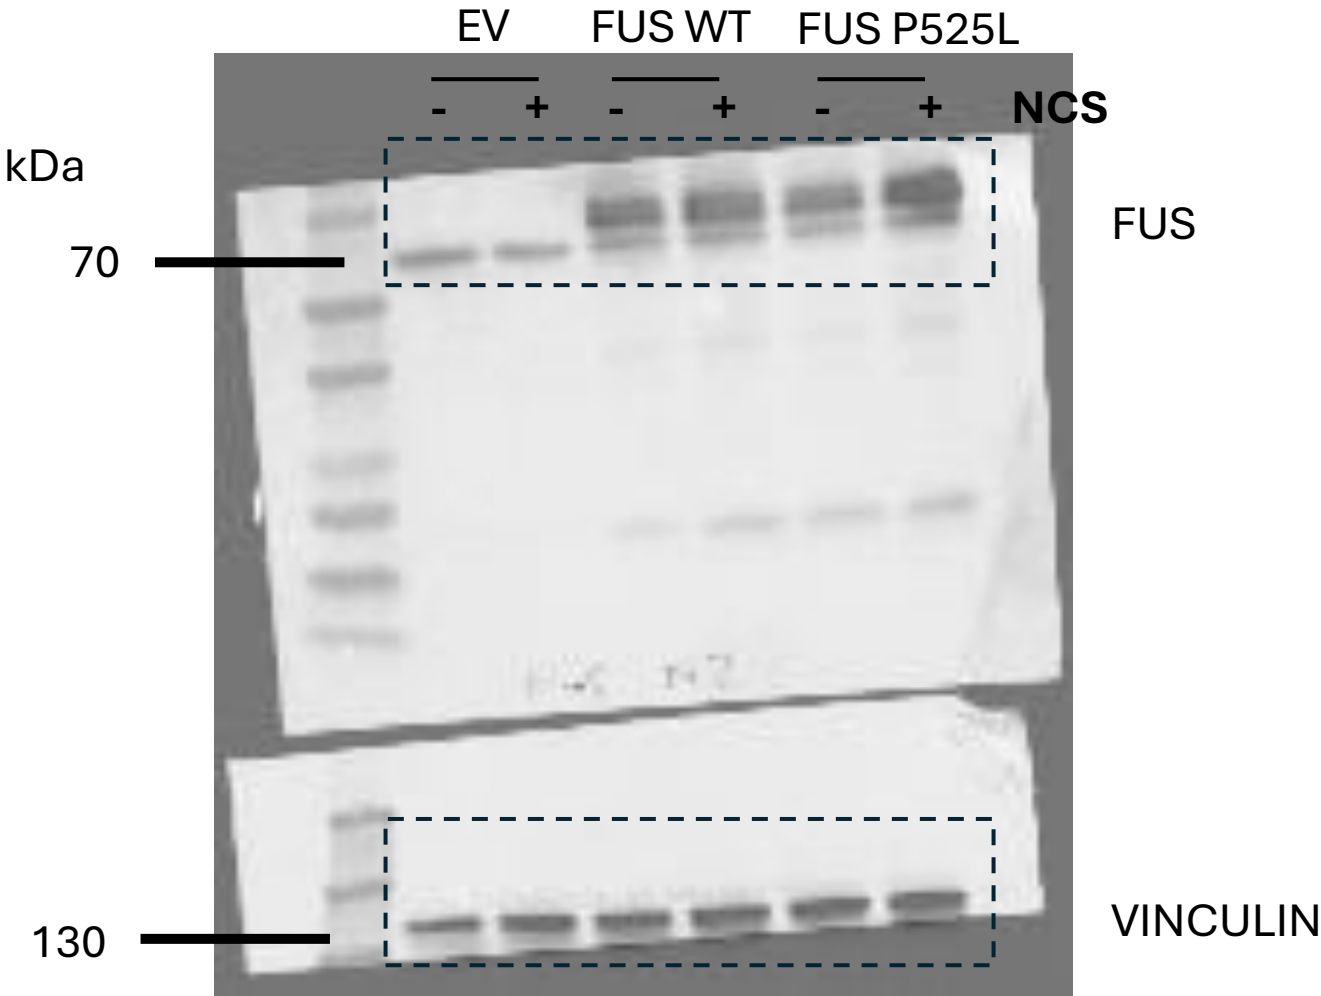

**Dashed lines indicate where membranes were cropped**

Relative to Fig. 2G

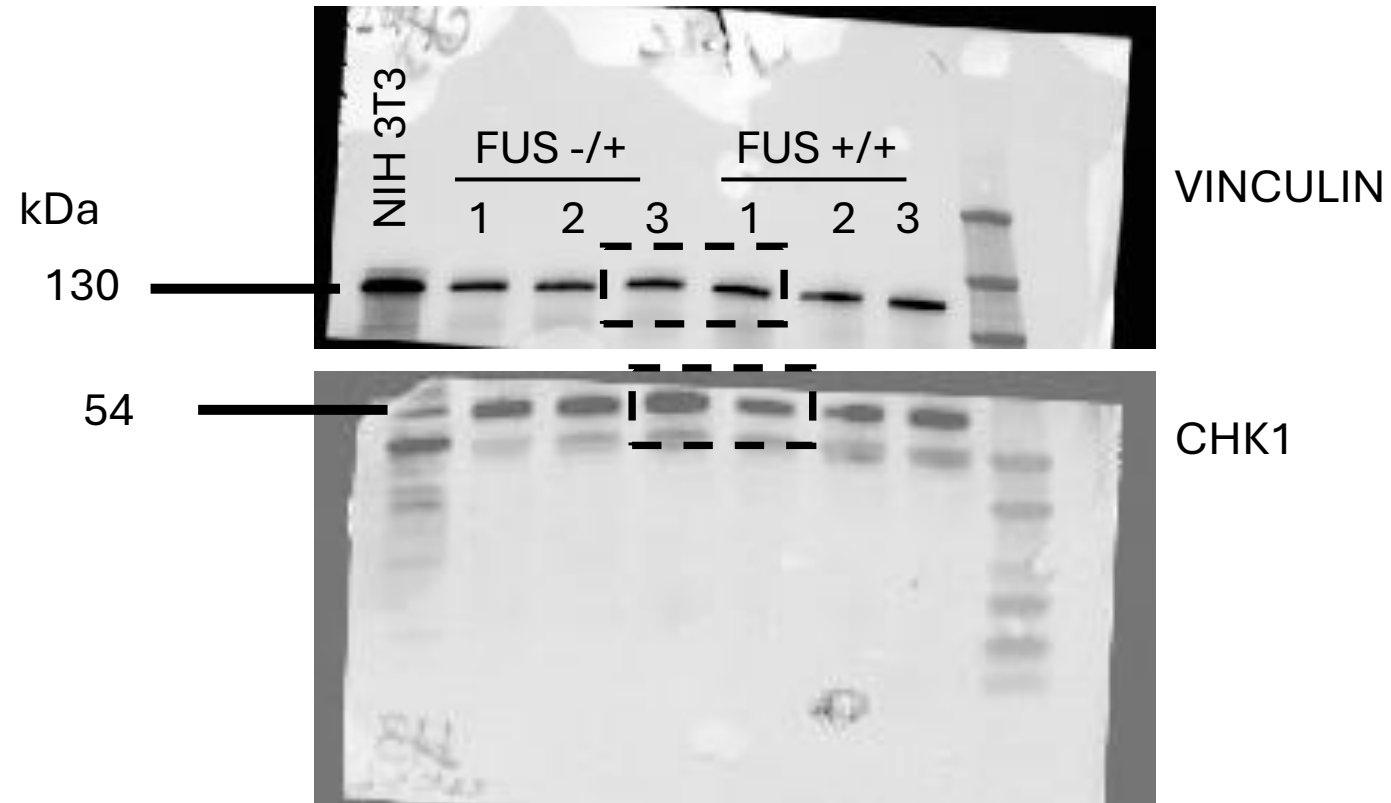

**Dashed lines indicate where membranes were cropped**

Relative to Fig. S2A

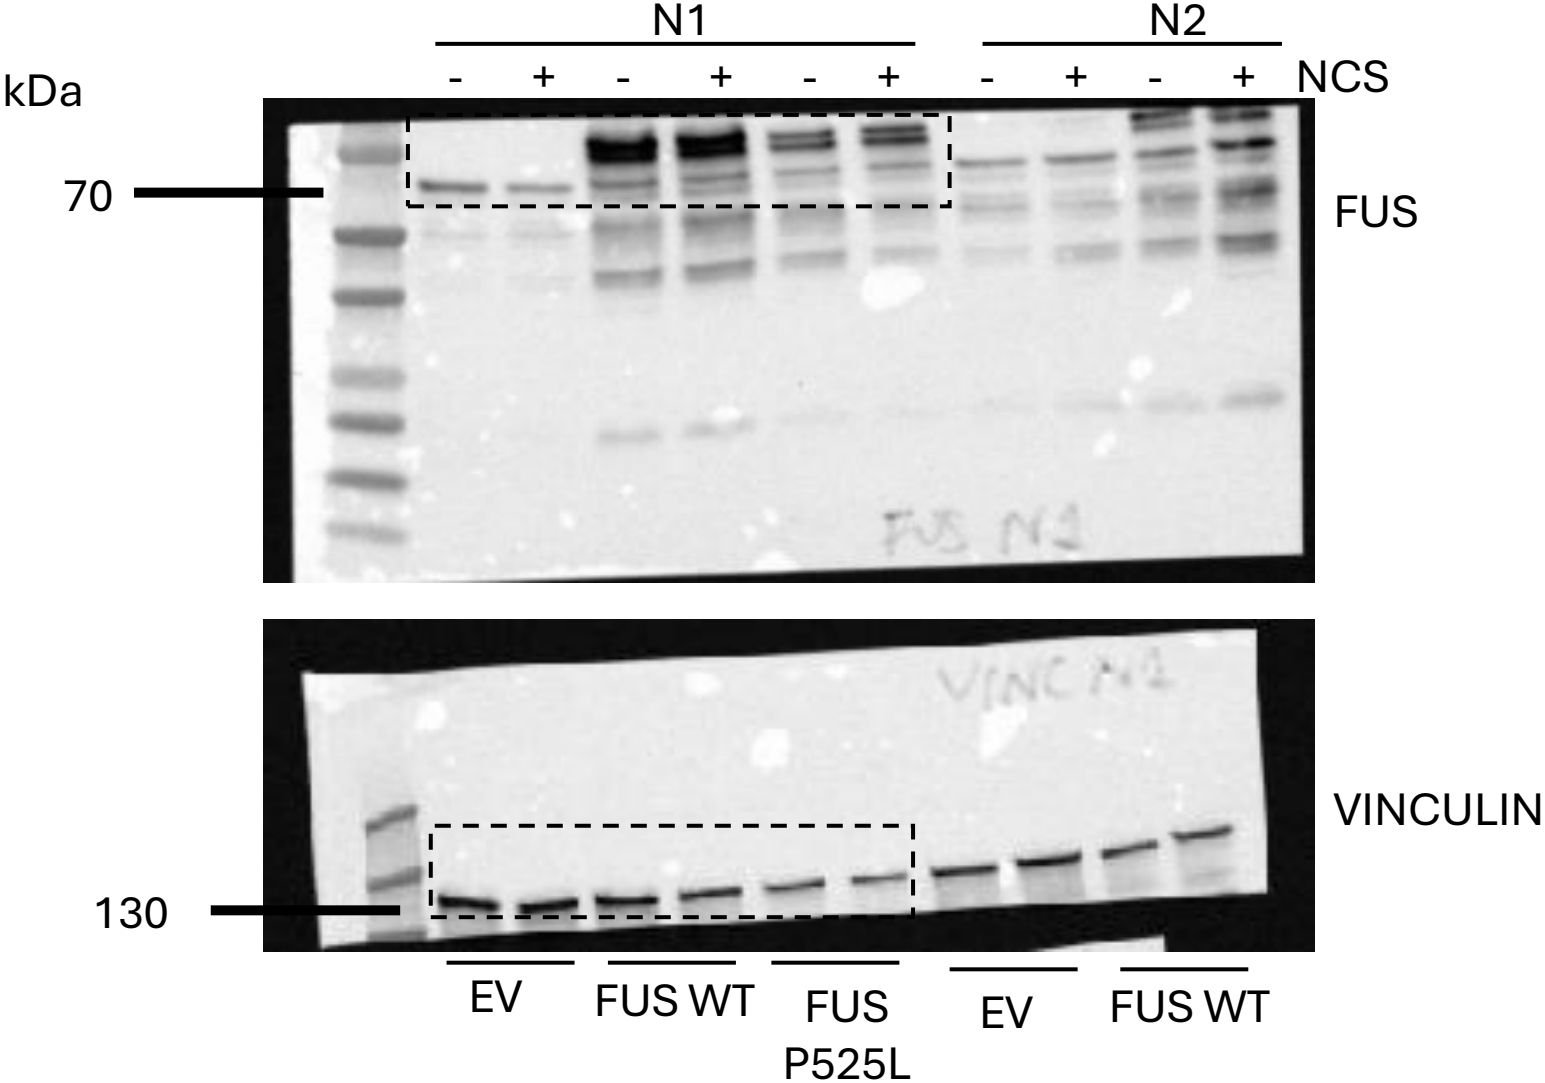

Dashed lines indicate where membranes were cropped

Relative to Fig.S3A

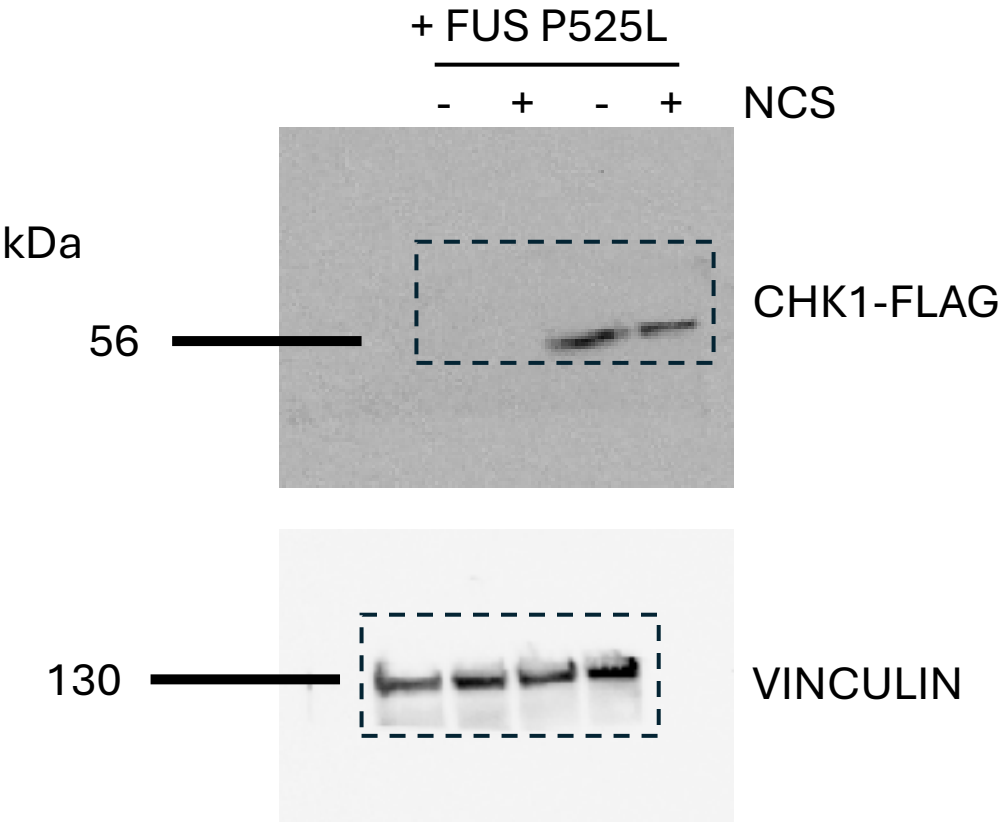

**Dashed lines indicate where membranes were cropped**

Relative to Fig. S3B

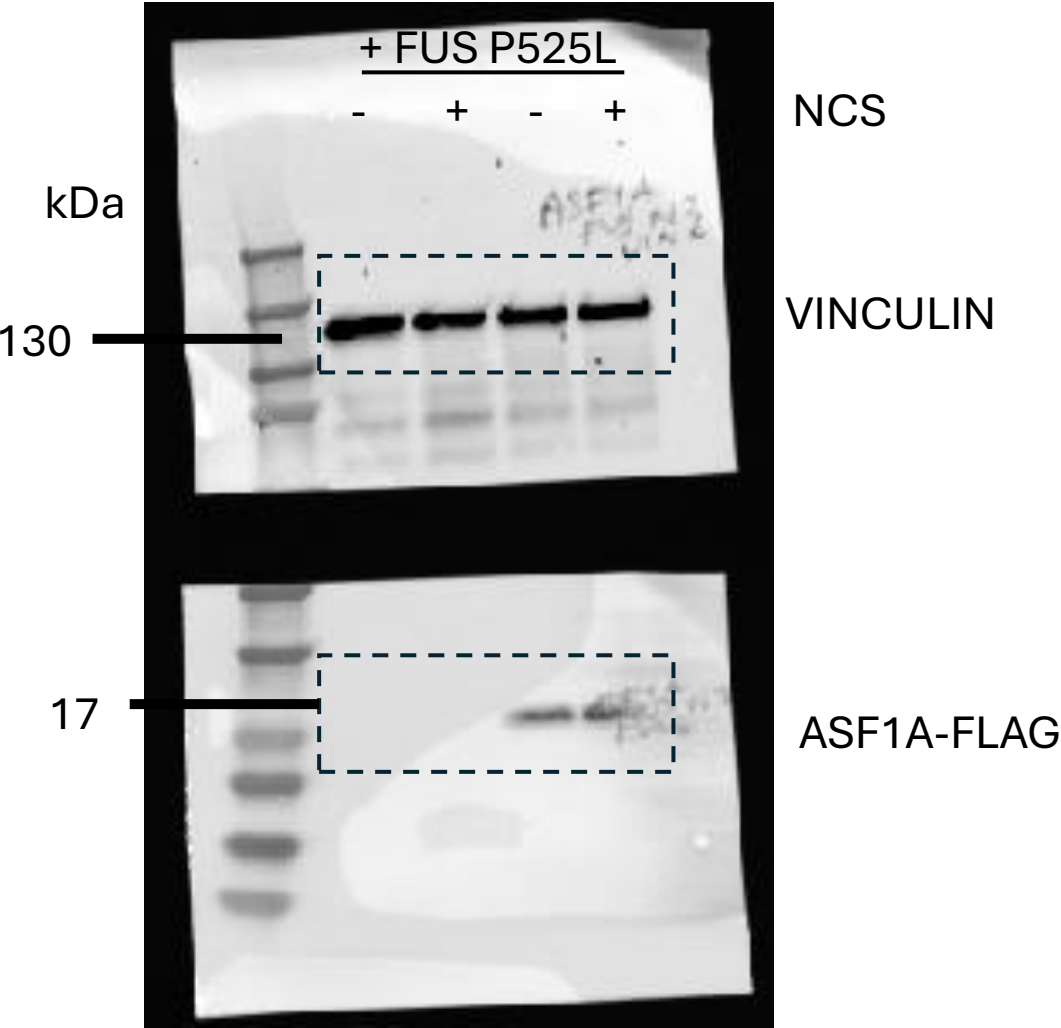

**Dashed lines indicate where membranes were cropped**

Relative to Fig. S3H

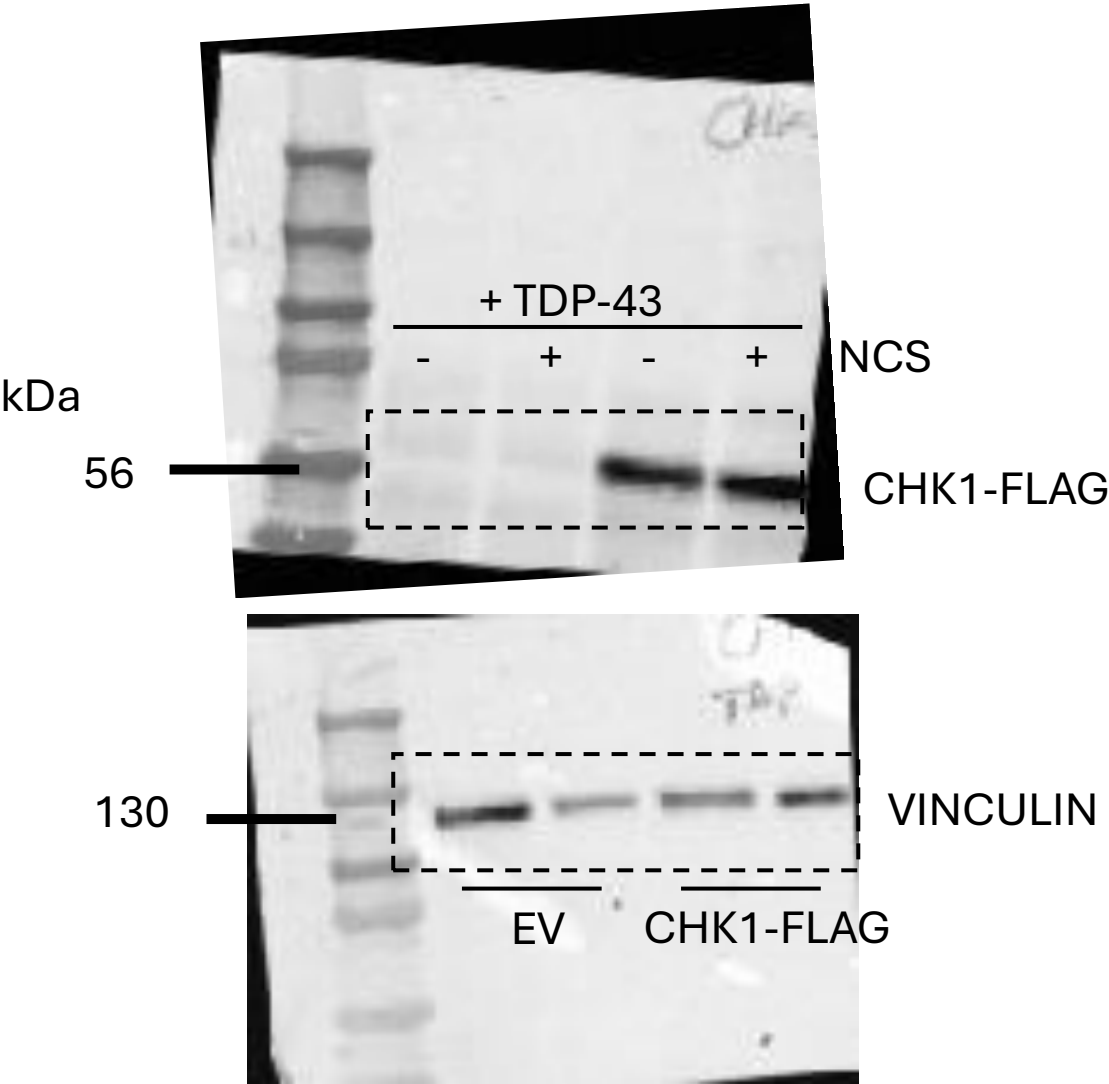

**Dashed lines indicate where membranes were cropped**

Relative to Fig. S3K

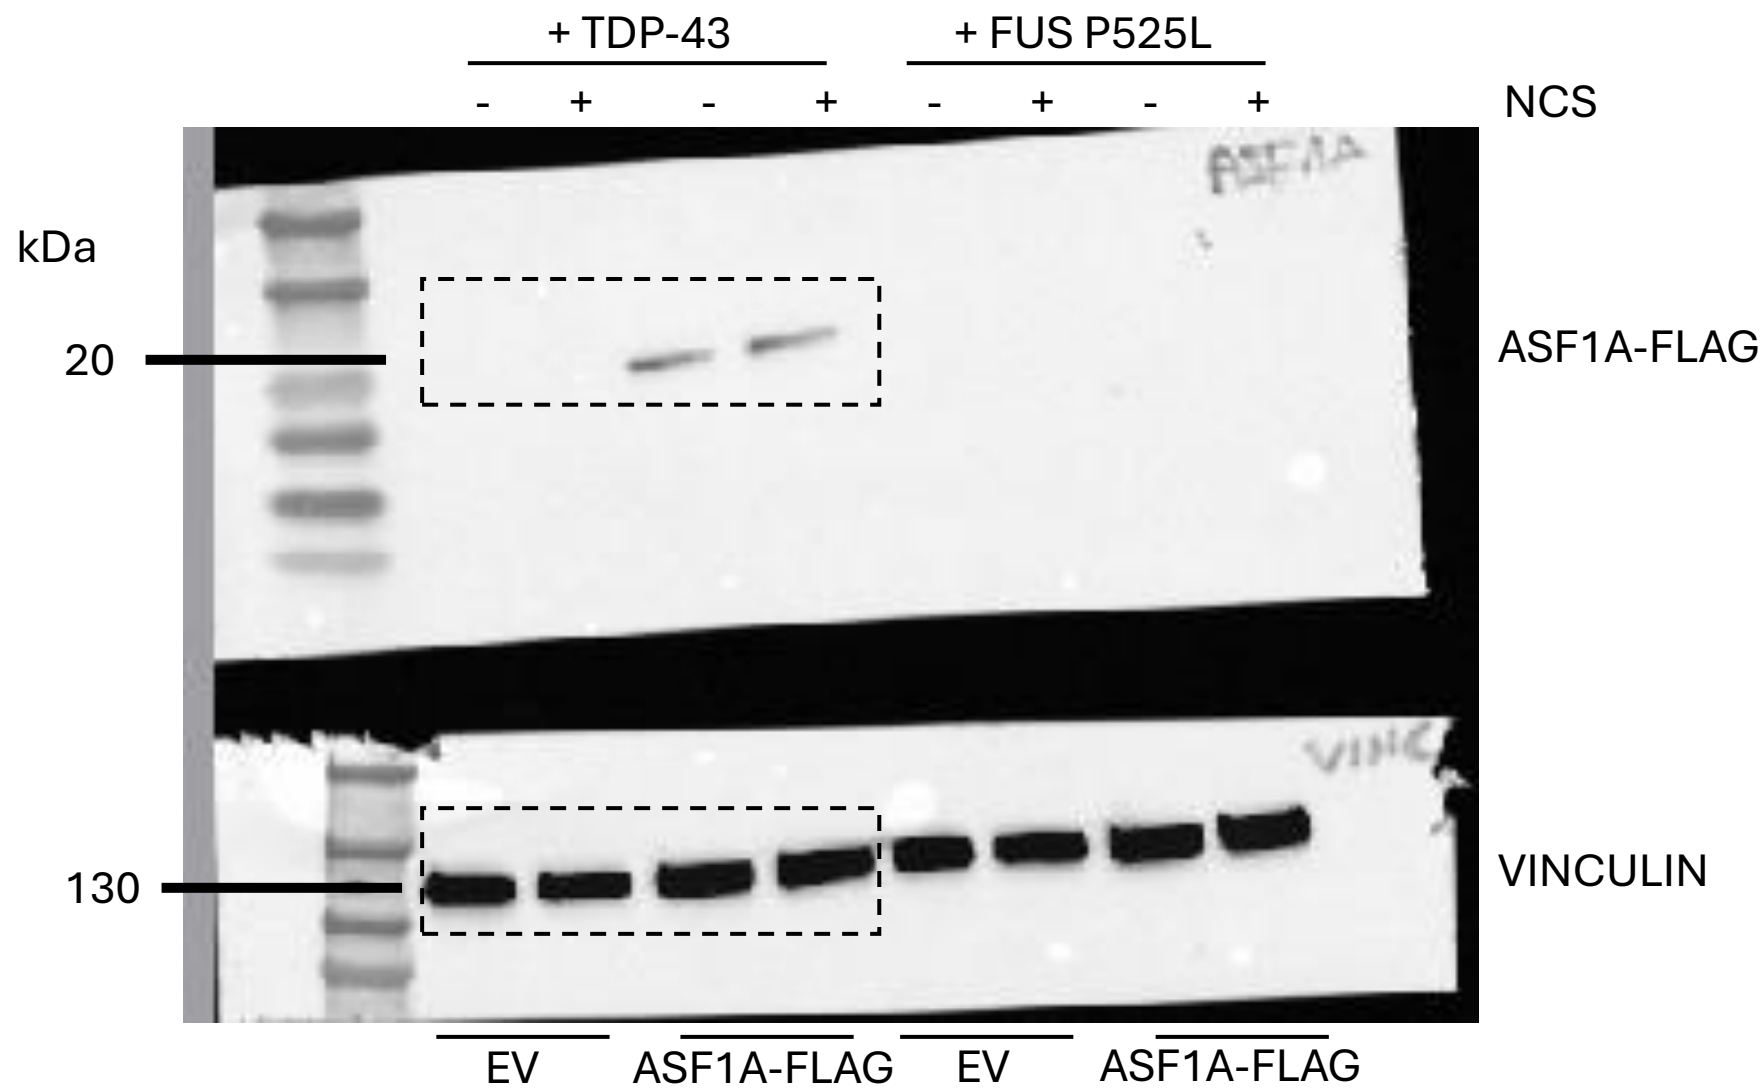

**Dashed lines indicate where membranes were cropped**

Relative to Fig. S4A

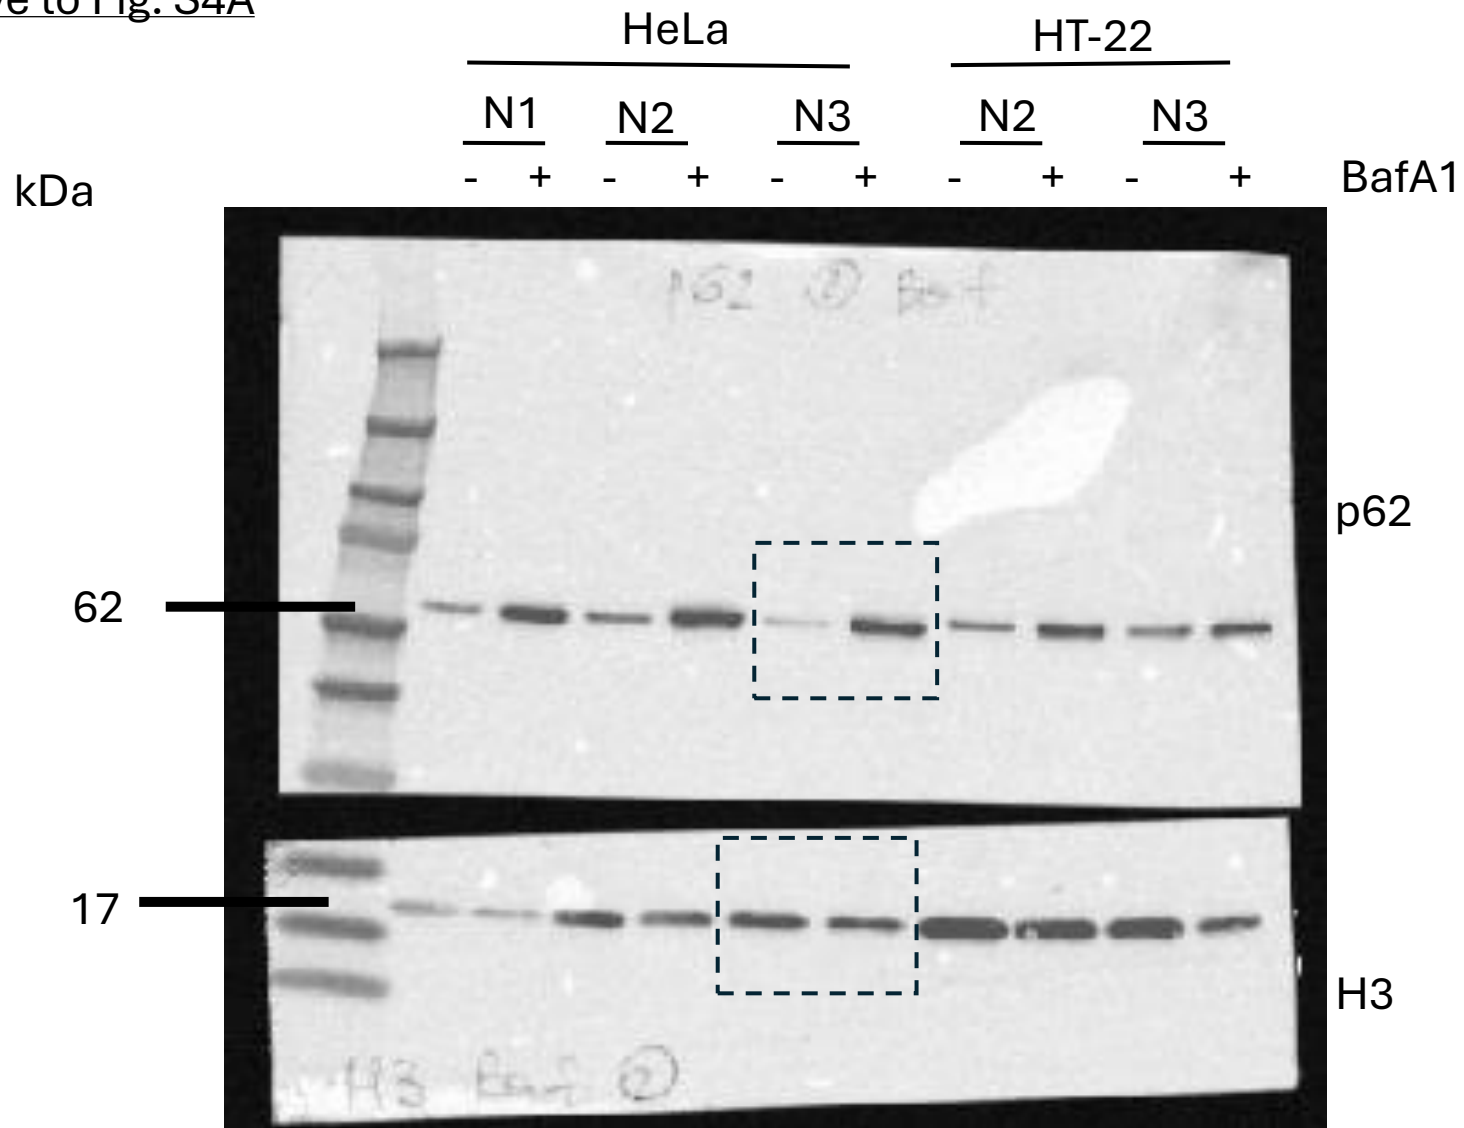



**Dashed lines indicate where membranes were cropped**

Relative to Fig. S4G

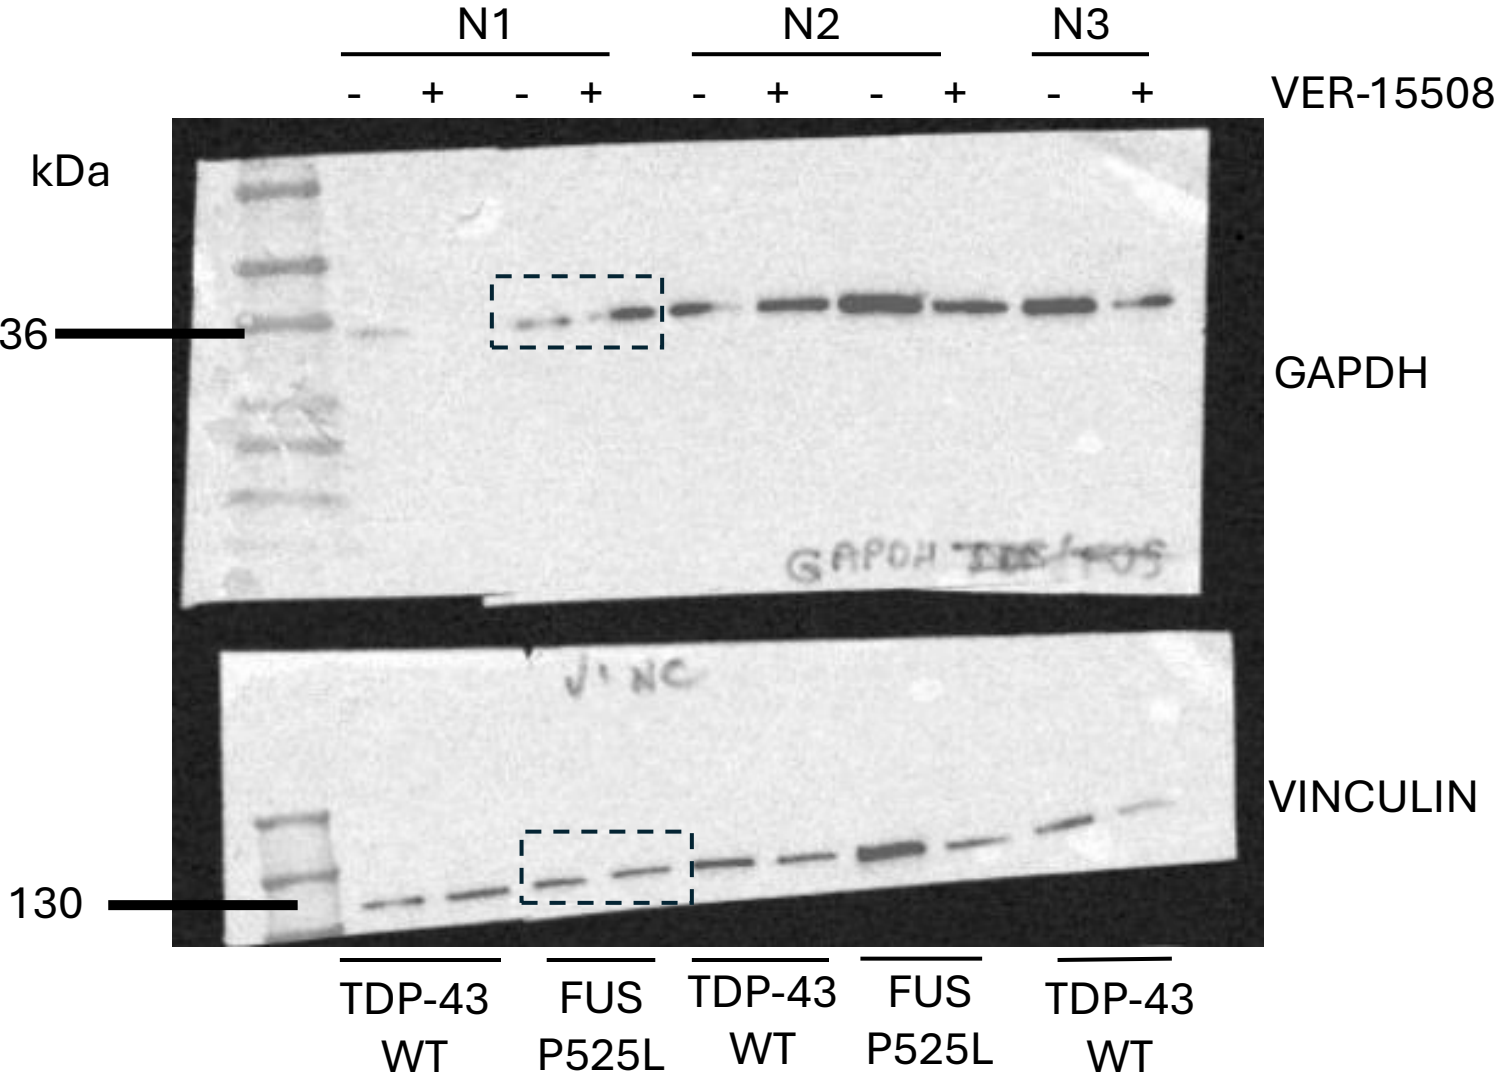

**Dashed lines indicate where membranes were cropped**

Relative to Fig. S4M

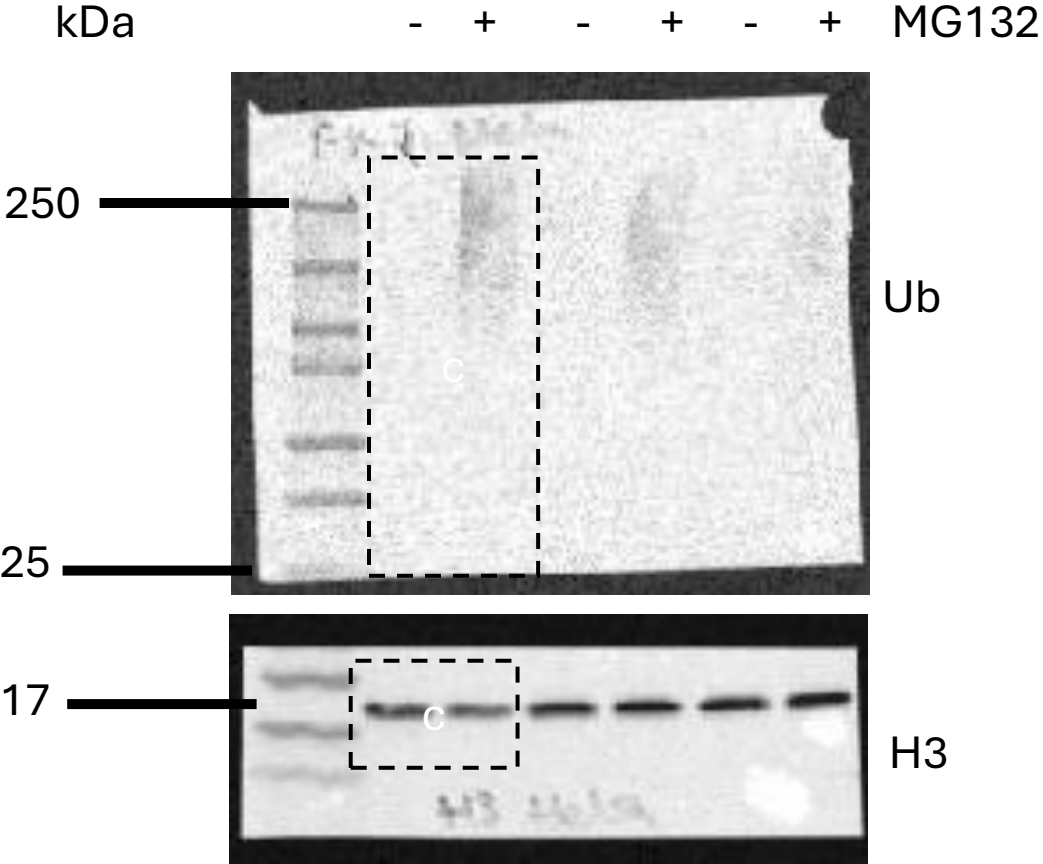

Dashed lines indicate where membranes were cropped

Relative to Fig. S4P

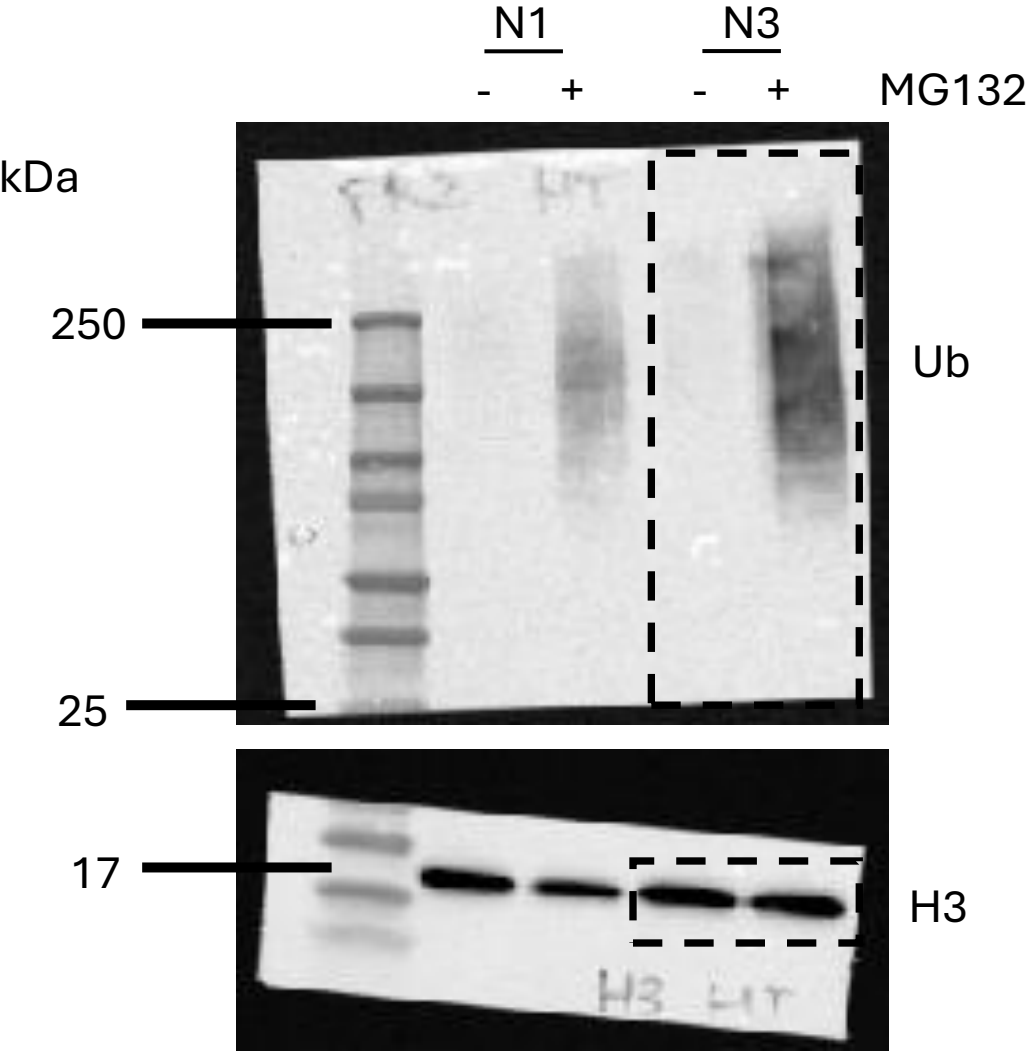

Supplement: Supplementary file 1 [file 97c475e51b97a363bb0e1a7d.pdf]
